# Supplementary material for: C-reactive Protein Concentration Is Associated With a Higher Risk of Mortality in a Rural Korean Population
Source: PubMed Central journal article supplement — J Prev Med Public Health. 2016 Aug 23;49(5):275–87. doi: 10.3961/jpmph.16.025 (PMC5066418; doi:10.3961/jpmph.16.025), 2016-08-23
Supplement: jpmph-49-5-275-supple1.pdf [file jpmph-49-5-275-supple1.pdf]

**Supplemental Table 1.** Comparison of baseline characteristics between study participants and non-participants

| Variables                        | Study participants |              | Non-participants |              | <i>p</i> -value <sup>1</sup> |
|----------------------------------|--------------------|--------------|------------------|--------------|------------------------------|
|                                  | n                  | Mean ± SD    | n                | Mean ± SD    |                              |
| Men                              |                    |              |                  |              |                              |
| Age (y)                          | 8862               | 58.9 ± 9.1   | 773              | 58.9 ± 9.2   | 0.88                         |
| Systolic blood pressure (mm Hg)  | 8862               | 127.9 ± 17.1 | 757              | 126.6 ± 17.5 | 0.04                         |
| Diastolic blood pressure (mm Hg) | 8862               | 81.5 ± 10.7  | 752              | 80.7 ± 11.8  | 0.07                         |
| Fasting blood glucose (mmol/L)   | 8862               | 5.33 ± 0.88  | 768              | 5.33 ± 0.94  | 0.60                         |
| Total cholesterol (mmol/L)       | 8862               | 5.03 ± 0.93  | 768              | 4.98 ± 0.97  | 0.12                         |
| Triglycerides (mmol/L)           | 8862               | 1.51 ± 1.22  | 767              | 1.41 ± 1.07  | 0.02                         |
| HDL cholesterol (mmol/L)         | 8862               | 1.14 ± 0.30  | 767              | 1.12 ± 0.29  | 0.14                         |
| C-reactive protein (mg/L)        | 8862               | 0.89 ± 1.34  | 233              | 0.85 ± 1.02  | 0.57                         |
| Women                            |                    |              |                  |              |                              |
| Age (y)                          | 14 371             | 57.8 ± 9.4   | 1502             | 56.3 ± 9.1   | <0.001                       |
| Systolic blood pressure (mm Hg)  | 14 371             | 125.2 ± 18.2 | 1476             | 124.3 ± 18.2 | 0.07                         |
| Diastolic blood pressure (mm Hg) | 14 371             | 78.4 ± 11.1  | 1466             | 77.2 ± 11.2  | <0.001                       |
| Fasting blood glucose (mmol/L)   | 14 371             | 5.11 ± 0.78  | 1494             | 5.05 ± 0.67  | <0.001                       |
| Total cholesterol (mmol/L)       | 14 371             | 5.30 ± 0.96  | 1494             | 5.20 ± 0.95  | <0.001                       |
| Triglycerides (mmol/L)           | 14 371             | 1.36 ± 0.96  | 1486             | 1.32 ± 0.93  | 0.05                         |
| HDL cholesterol (mmol/L)         | 14 371             | 1.20 ± 0.29  | 1493             | 1.20 ± 0.28  | 0.43                         |
| C-reactive protein (mg/L)        | 14 371             | 0.68 ± 1.03  | 434              | 0.64 ± 1.03  | 0.17                         |

Values of the concentrations of fasting glucose, triglycerides, and C-reactive protein are presented as median ± IQR, while other variables are presented as mean ± SD.

HDL, high-density lipoprotein; SD, standard deviation; IQR, interquartile range.

<sup>1</sup>*p*-values were derived from the *t*-test and the Mann-Whitney test.
