# Supplementary material for: C-reactive Protein Concentration Is Associated With a Higher Risk of Mortality in a Rural Korean Population
Source: PubMed Central journal article supplement — J Prev Med Public Health. 2016 Aug 23;49(5):275–87. doi: 10.3961/jpmph.16.025 (PMC5066418; doi:10.3961/jpmph.16.025), 2016-08-23
Supplement: jpmph-49-5-275-supple2.pdf [file jpmph-49-5-275-supple2.pdf]

**Supplemental Table 2.** Cox regression analysis of CRP on all-cause and cardiovascular mortality according to the presence of hypertension (by CRP group)

|                          | n    | No. of deaths | Mortality per 1000 person-years | Multi-adjusted <sup>1</sup> HR (95% CI) | p for interaction (vs. low-CRP group) |
|--------------------------|------|---------------|---------------------------------|-----------------------------------------|---------------------------------------|
| All-cause mortality      |      |               |                                 |                                         |                                       |
| Men                      |      |               |                                 |                                         |                                       |
| Low-CRP group            |      |               |                                 |                                         |                                       |
| No hypertension          | 2798 | 138           | 7.6                             | 1.00 (reference)                        |                                       |
| Hypertension             | 2021 | 135           | 10.1                            | 1.10 (0.84, 1.44)                       |                                       |
| Intermediate-CRP group   |      |               |                                 |                                         |                                       |
| No hypertension          | 1458 | 109           | 11.5                            | 1.25 (0.97, 1.61)                       | 0.46                                  |
| Hypertension             | 1510 | 116           | 11.6                            | 1.20 (0.90, 1.60)                       |                                       |
| High-CRP group           |      |               |                                 |                                         |                                       |
| No hypertension          | 540  | 76            | 22.0                            | 2.23 (1.28, 2.96)                       | 0.23                                  |
| Hypertension             | 535  | 75            | 21.7                            | 1.92 (1.40, 2.63)                       |                                       |
| Women                    |      |               |                                 |                                         |                                       |
| Low-CRP group            |      |               |                                 |                                         |                                       |
| No hypertension          | 5783 | 94            | 2.5                             | 1.00 (reference)                        |                                       |
| Hypertension             | 3438 | 95            | 4.2                             | 1.04 (0.74, 1.45)                       |                                       |
| Intermediate-CRP group   |      |               |                                 |                                         |                                       |
| No hypertension          | 1902 | 45            | 3.6                             | 1.12 (0.78, 1.61)                       | 0.41                                  |
| Hypertension             | 1956 | 82            | 6.3                             | 1.42 (1.00, 2.01)                       |                                       |
| High-CRP group           |      |               |                                 |                                         |                                       |
| No hypertension          | 636  | 29            | 6.9                             | 2.06 (1.35, 3.15)                       | 0.02                                  |
| Hypertension             | 656  | 22            | 4.9                             | 1.02 (0.61, 1.71)                       |                                       |
| Cardiovascular mortality |      |               |                                 |                                         |                                       |
| Men                      |      |               |                                 |                                         |                                       |
| Low-CRP group            |      |               |                                 |                                         |                                       |
| No hypertension          | 2798 | 21            | 1.2                             | 1.00 (reference)                        |                                       |
| Hypertension             | 2021 | 18            | 1.3                             | 0.56 (0.27, 1.18)                       |                                       |
| Intermediate-CRP group   |      |               |                                 |                                         |                                       |
| No hypertension          | 1458 | 13            | 1.4                             | 0.92 (0.46, 1.86)                       | 0.63                                  |
| Hypertension             | 1510 | 17            | 1.7                             | 0.66 (0.31, 1.39)                       |                                       |
| High-CRP group           |      |               |                                 |                                         |                                       |
| No hypertension          | 540  | 7             | 2.0                             | 1.26 (0.53, 3.00)                       | 0.41                                  |
| Hypertension             | 535  | 11            | 3.2                             | 1.15 (0.50, 2.64)                       |                                       |
| Women                    |      |               |                                 |                                         |                                       |
| Low-CRP group            |      |               |                                 |                                         |                                       |
| No hypertension          | 5783 | 19            | 0.5                             | 1.00 (reference)                        |                                       |
| Hypertension             | 3438 | 21            | 0.9                             | 0.78 (0.37, 1.62)                       |                                       |
| Intermediate-CRP group   |      |               |                                 |                                         |                                       |
| No hypertension          | 1902 | 8             | 0.6                             | 0.96 (0.42, 2.22)                       | 0.34                                  |
| Hypertension             | 1956 | 19            | 1.5                             | 1.24 (0.58, 2.66)                       |                                       |
| High-CRP group           |      |               |                                 |                                         |                                       |
| No hypertension          | 636  | 4             | 1.0                             | 1.50 (0.50, 4.49)                       | 0.93                                  |
| Hypertension             | 656  | 7             | 1.6                             | 1.23 (0.46, 3.31)                       |                                       |

CRP, C-reactive protein; HR, hazard ratio; CI, confidence interval.

<sup>1</sup>Adjusted for age, rural region, body mass index, educational status, alcohol use, smoking status, regular exercise, the presence of disease (diabetes and dyslipidemia), systolic blood pressure, diastolic blood pressure, fasting blood glucose, and concentrations of total cholesterol, triglycerides, and high-density lipoprotein cholesterol.
